# Supplementary material
Source: publisher figshare collection journal article supplement (https://tandf.figshare.com/ndownloader/files/22105824)
Supplement: Supplementary file 1 [file 22105824]

**SUPPLEMENTARY MATERIAL**

One-pot synthesis of novel fused mesoionic compounds: 1-substituted-5-thioxo-5,6-dihydro-[1,2,4]triazolo[1,5-*c*]quinazolin-1-ium-2-thiolates

Sergiy M. Kovalenkoa, Oleksandr G. Drushlyak*b, and Illia O. Mariutsab

a Department of Organic Chemistry, V. N. Karazin Kharkiv National University, Svobody sq. 4, Kharkiv 61077, Ukraine, E-mail: [kovalenko.sergiy.m@gmail.com](mailto:kovalenko.sergiy.m@gmail.com);

b Faculty of Pharmacy, The National University of Pharmacy, 53 Pushkinska st., Kharkiv 61002, Ukraine, E-mail: aldry18@hotmail.com

**Corresponding author, e-mail:** Oleksandr G. Drushlyak [aldry18@hotmail.com](mailto:aldry18@hotmail.com)

**Contents**

3-Benzyl-1-(4-oxo-2-thioxo-1,4-dihydroquinazo­lin-3(2*H*)-yl)thiourea **3a**. 4

**Figure S1**. 1H NMR spectrum (400 MHz, DMSO-d6) of 3-benzyl-1-(4-oxo-2-thioxo-1,4-dihydroquinazo­lin-3(2*H*)-yl)thiourea **3a** 4

**Figure S2**. 13C NMR spectrum (100 MHz, DMSO-d6) of 3-benzyl-1-(4-oxo-2-thioxo-1,4-dihydroquinazo­lin-3(2*H*)-yl)thiourea **3a** 4

**Figure S3**. LC/MS data for 3-benzyl-1-(4-oxo-2-thioxo-1,4-dihydroquinazo­lin-3(2*H*)-yl)thiourea **3a** 5

**Figure S4**. IR spectrum of 3-benzyl-1-(4-oxo-2-thioxo-1,4-dihydroquinazo­lin-3(2*H*)-yl)thiourea **3a** 6

**Figure S5**.UV/Vis spectrum of 3-benzyl-1-(4-oxo-2-thioxo-1,4-dihydroquinazo­lin-3(2*H*)-yl)thiourea **3a** (MeOH) 6

3-Ethyl-1-(4-oxo-2-thioxo-1,4-dihydroquinazo­lin-3(2*H*)-yl)thiourea **3b** 7

**Figure S6**. 1H NMR spectrum (400 MHz, DMSO-d6) of 3-ethyl-1-(4-oxo-2-thioxo-1,4-dihydroquinazo­lin-3(2*H*)-yl)thiourea **3b** 7

**Figure S7**. 13C NMR spectrum (100 MHz, DMSO-d6) of 3-ethyl-1-(4-oxo-2-thioxo-1,4-dihydroquinazo­lin-3(2*H*)-yl)thiourea **3b** 7

**Figure S8**. LC/MS data for 3-ethyl-1-(4-oxo-2-thioxo-1,4-dihydroquinazo­lin-3(2*H*)-yl)thiourea **3b**  8

**Figure S9**. IR spectrum of 3-ethyl-1-(4-oxo-2-thioxo-1,4-dihydroquinazo­lin-3(2*H*)-yl)thiourea **3b**  9

**Figure S10**.UV/Vis spectrum of 3-ethyl-1-(4-oxo-2-thioxo-1,4-dihydroquinazo­lin-3(2*H*)-yl)thiourea **3b** (MeOH) 9

1-(4-Oxo-2-thioxo-1,4-dihydroquinazo­lin-3(2*H*)-yl)-3-phenylthiourea **3c** 10

**Figure S11**. 1H NMR spectrum (400 MHz, DMSO-d6) of 1-(4-Oxo-2-thioxo-1,4-dihydroquinazo­lin-3(2*H*)-yl)-3-phenylthiourea **3c** 10

**Figure S12**. 13C NMR spectrum (100 MHz, DMSO-d6) of 1-(4-Oxo-2-thioxo-1,4-dihydroquinazo­lin-3(2*H*)-yl)-3-phenylthiourea **3c** 10

**Figure S13**. LC/MS data for 1-(4-Oxo-2-thioxo-1,4-dihydroquinazo­lin-3(2*H*)-yl)-3-phenylthiourea **3c** 11

**Figure S14**. IR spectrum of 1-(4-Oxo-2-thioxo-1,4-dihydroquinazo­lin-3(2*H*)-yl)-3-phenylthiourea **3c** 12

**Figure S15**.UV/Vis spectrum of 1-(4-Oxo-2-thioxo-1,4-dihydroquinazo­lin-3(2*H*)-yl)-3-phenylthiourea **3c** (MeOH) 12

1-Benzyl-5-thioxo-5,6-dihydro-[1,2,4]triazolo[1,5-c]quina­zolin-1-ium-2-thiolate **6a** 13

**Figure S16**. 1H NMR spectrum (400 MHz, DMSO-d6) of 1-benzyl-5-thioxo-5,6-dihydro-[1,2,4]triazolo[1,5-c]quina­zolin-1-ium-2-thiolate **6a** 13

**Figure S17**. 13C NMR spectrum (100 MHz, DMSO-d6) of 1-benzyl-5-thioxo-5,6-dihydro-[1,2,4]triazolo[1,5-c]quina­zolin-1-ium-2-thiolate **6a** 13

**Figure S18**. LC/MS data for 1-benzyl-5-thioxo-5,6-dihydro-[1,2,4]triazolo[1,5-c]quina­zolin-1-ium-2-thiolate **6a** 14

**Figure S19**. IR spectrum of 1-benzyl-5-thioxo-5,6-dihydro-[1,2,4]triazolo[1,5-c]quina­zolin-1-ium-2-thiolate **6a** 15

**Figure S20**.UV/Vis spectrum of 1-benzyl-5-thioxo-5,6-dihydro-[1,2,4]triazolo[1,5-c]quina­zolin-1-ium-2-thiolate **6a** (MeOH) 15

1-Ethyl-5-thioxo-5,6-dihydro-[1,2,4]triazolo[1,5-c]­quina­zolin-1-ium-2-thiolate **6b** 16

**Figure S21**. 1H NMR spectrum (400 MHz, DMSO-d6) of 1-ethyl-5-thioxo-5,6-dihydro-[1,2,4]triazolo[1,5-c]­quina­zolin-1-ium-2-thiolate **6b** 16

**Figure S22**. 13C NMR spectrum (100 MHz, DMSO-d6) of 1-ethyl-5-thioxo-5,6-dihydro-[1,2,4]triazolo[1,5-c]­quina­zolin-1-ium-2-thiolate **6b** 16

**Figure S23**. LC/MS data for 1-ethyl-5-thioxo-5,6-dihydro-[1,2,4]triazolo[1,5-c]­quina­zolin-1-ium-2-thiolate **6b** 17

**Figure S24**. IR spectrum of 1-ethyl-5-thioxo-5,6-dihydro-[1,2,4]triazolo[1,5-c]­quina­zolin-1-ium-2-thiolate **6b** 18

**Figure S25**.UV/Vis spectrum of 1-ethyl-5-thioxo-5,6-dihydro-[1,2,4]triazolo[1,5-c]­quina­zolin-1-ium-2-thiolate **6b** (MeOH) 18

1-Phenyl-5-thioxo-5,6-dihydro-[1,2,4]tri­azo­lo[1,5-c]quina­zolin-1-ium-2-thiolate **6c** 19

**Figure S26**. 1H NMR spectrum (400 MHz, DMSO-d6) of 1-phenyl-5-thioxo-5,6-dihydro-[1,2,4]tri­azo­lo[1,5-c]quina­zolin-1-ium-2-thiolate **6c** 19

**Figure S27**. 13C NMR spectrum (100 MHz, DMSO-d6) of 1-phenyl-5-thioxo-5,6-dihydro-[1,2,4]tri­azo­lo[1,5-c]quina­zolin-1-ium-2-thiolate **6c** 19

**Figure S28**. LC/MS data for 1-phenyl-5-thioxo-5,6-dihydro-[1,2,4]tri­azo­lo[1,5-c]quina­zolin-1-ium-2-thiolate **6c** 20

**Figure S29**. IR spectrum of 1-phenyl-5-thioxo-5,6-dihydro-[1,2,4]tri­azo­lo[1,5-c]quina­zolin-1-ium-2-thiolate **6c** 21

**Figure S30**.UV/Vis spectrum of 1-phenyl-5-thioxo-5,6-dihydro-[1,2,4]tri­azo­lo[1,5-c]quina­zolin-1-ium-2-thiolate **6c** (MeOH) 21

**3-Benzyl-1-(4-oxo-2-thioxo-1,4-dihydroquinazo­lin-3(2*H*)-yl)thiourea** **3a**

**Figure S1**. 1H NMR spectrum (400 MHz, DMSO-d6) of 3-benzyl-1-(4-oxo-2-thioxo-1,4-dihydroquinazo­lin-3(2*H*)-yl)thiourea **3a.**

**Figure S2**. 13C NMR spectrum (100 MHz, DMSO-d6) of 3-benzyl-1-(4-oxo-2-thioxo-1,4-dihydroquinazo­lin-3(2*H*)-yl)thiourea **3a.**


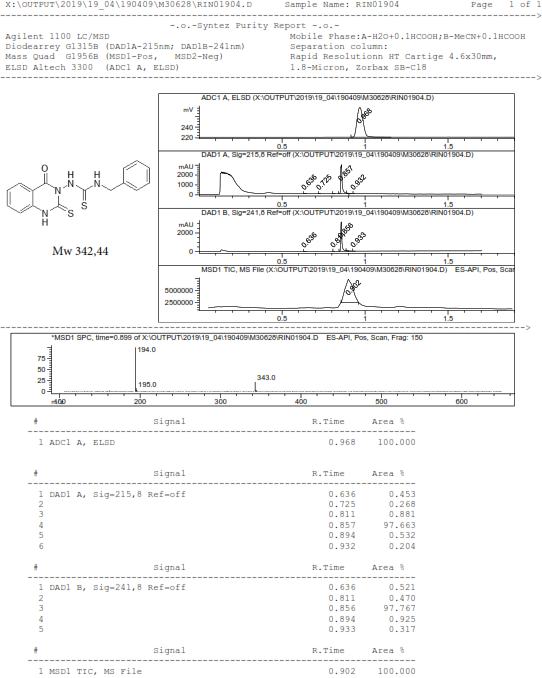


**Figure S3**. LC/MS data for 3-benzyl-1-(4-oxo-2-thioxo-1,4-dihydroquinazo­lin-3(2*H*)-yl)thiourea **3a.**

**Figure S4.** IR spectrum of 3-benzyl-1-(4-oxo-2-thioxo-1,4-dihydroquinazo­lin-3(2*H*)-yl)thiourea **3a.**

**Figure S5**. UV/Vis spectrum of 3-benzyl-1-(4-oxo-2-thioxo-1,4-dihydroquinazo­lin-3(2*H*)-yl)thiourea **3a** (MeOH).

**3-Ethyl-1-(4-oxo-2-thioxo-1,4-dihydroquinazo­lin-3(2*H*)-yl)thiourea** **3b**
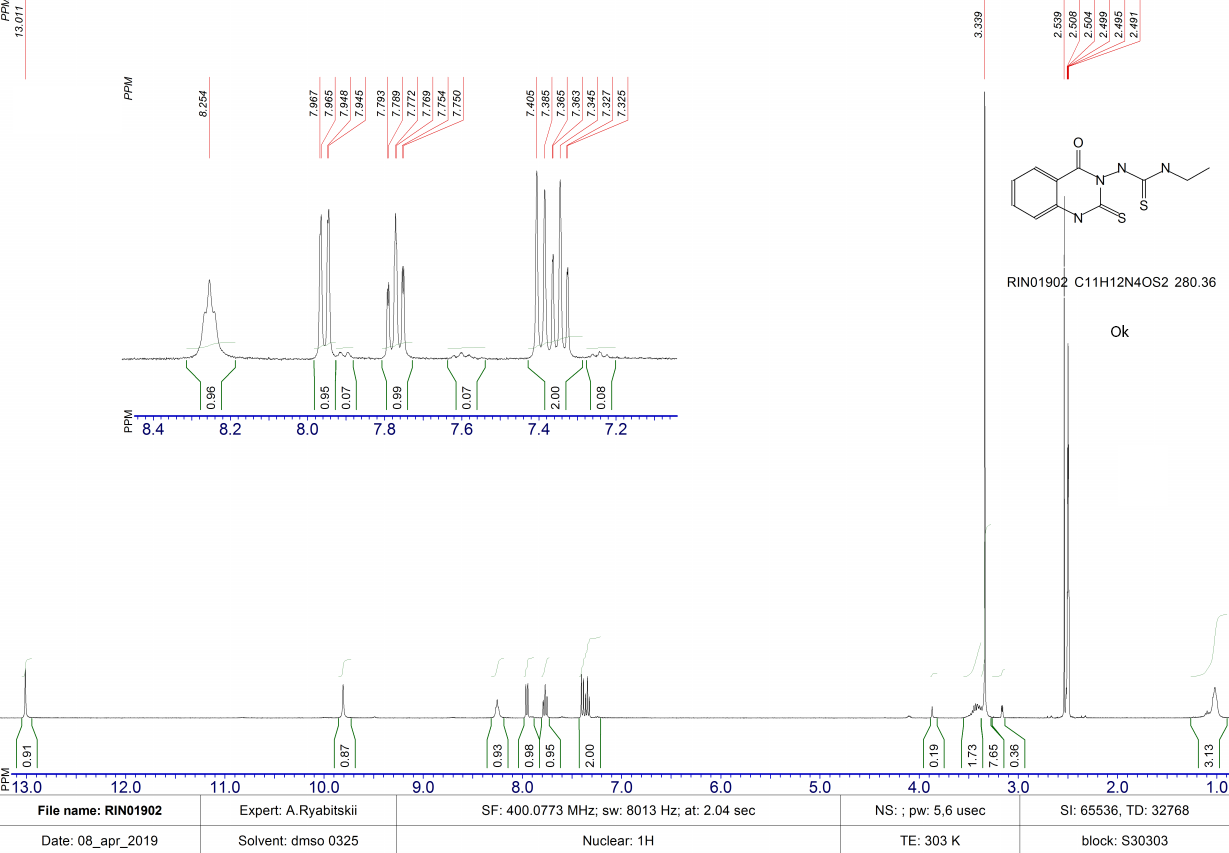


**Figure S6**. 1H NMR spectrum (400 MHz, DMSO-d6) of 3-ethyl-1-(4-oxo-2-thioxo-1,4-dihydroquinazo­lin-3(2*H*)-yl)thiourea **3b.**

**Figure S7**. 13C NMR spectrum (100 MHz, DMSO-d6) of 3-ethyl-1-(4-oxo-2-thioxo-1,4-dihydroquinazo­lin-3(2*H*)-yl)thiourea **3b.**


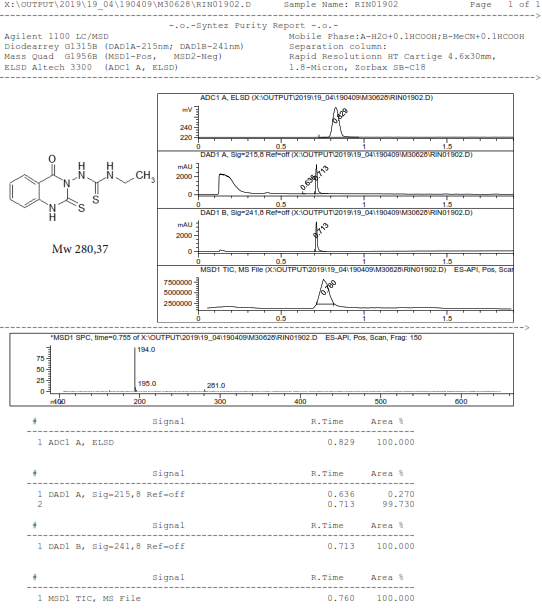


**Figure S8**. LC/MS data for 3-ethyl-1-(4-oxo-2-thioxo-1,4-dihydroquinazo­lin-3(2*H*)-yl)thiourea **3b.**

**Figure S9**. IR spectrum of 3-ethyl-1-(4-oxo-2-thioxo-1,4-dihydroquinazo­lin-3(2*H*)-yl)thiourea **3b.**

**Figure S10**.UV/Vis spectrum of 3-ethyl-1-(4-oxo-2-thioxo-1,4-dihydroquinazo­lin-3(2*H*)-yl)thiourea **3b** (MeOH).

**1-(4-Oxo-2-thioxo-1,4-dihydroquinazo­lin-3(2*H*)-yl)-3-phenylthiourea 3c**.


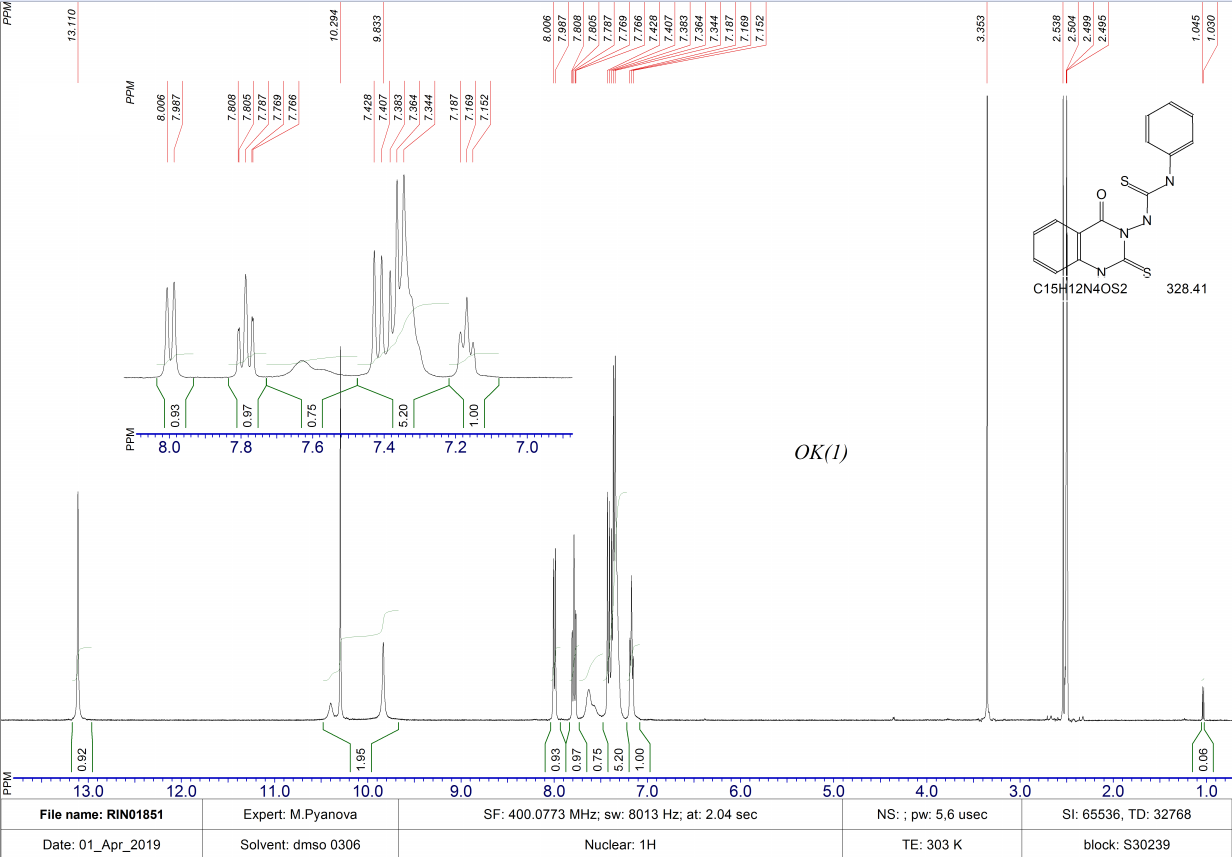


**Figure S11**. 1H NMR spectrum (400 MHz, DMSO-d6) of 1-(4-Oxo-2-thioxo-1,4-dihydroquinazo­lin-3(2*H*)-yl)-3-phenylthiourea **3c.**

**
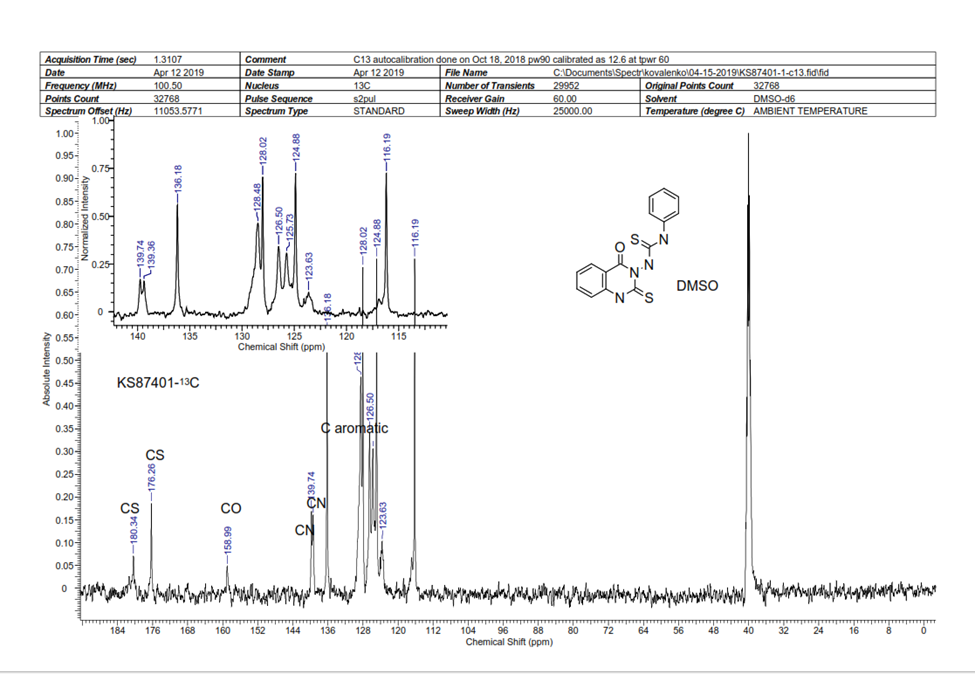
**

**Figure S12**. 13C NMR spectrum (100 MHz, DMSO-d6) of 1-(4-Oxo-2-thioxo-1,4-dihydroquinazo­lin-3(2*H*)-yl)-3-phenylthiourea **3c.**


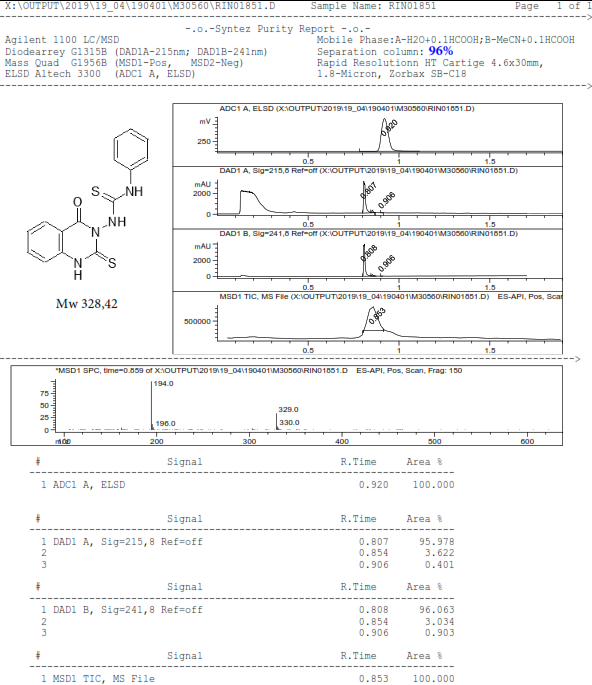


**Figure S13**. LC/MS data for 1-(4-Oxo-2-thioxo-1,4-dihydroquinazo­lin-3(2*H*)-yl)-3-phenylthiourea **3c.**

**Figure S14**. IR spectrum of 1-(4-Oxo-2-thioxo-1,4-dihydroquinazo­lin-3(2*H*)-yl)-3-phenylthiourea **3c.**

**Figure S15**.UV/Vis spectrum of 1-(4-Oxo-2-thioxo-1,4-dihydroquinazo­lin-3(2*H*)-yl)-3-phenylthiourea **3c** (MeOH).

**1-Benzyl-5-thioxo-5,6-dihydro-[1,2,4]triazolo[1,5-c]quina­zolin-1-ium-2-thiolate 6a**.


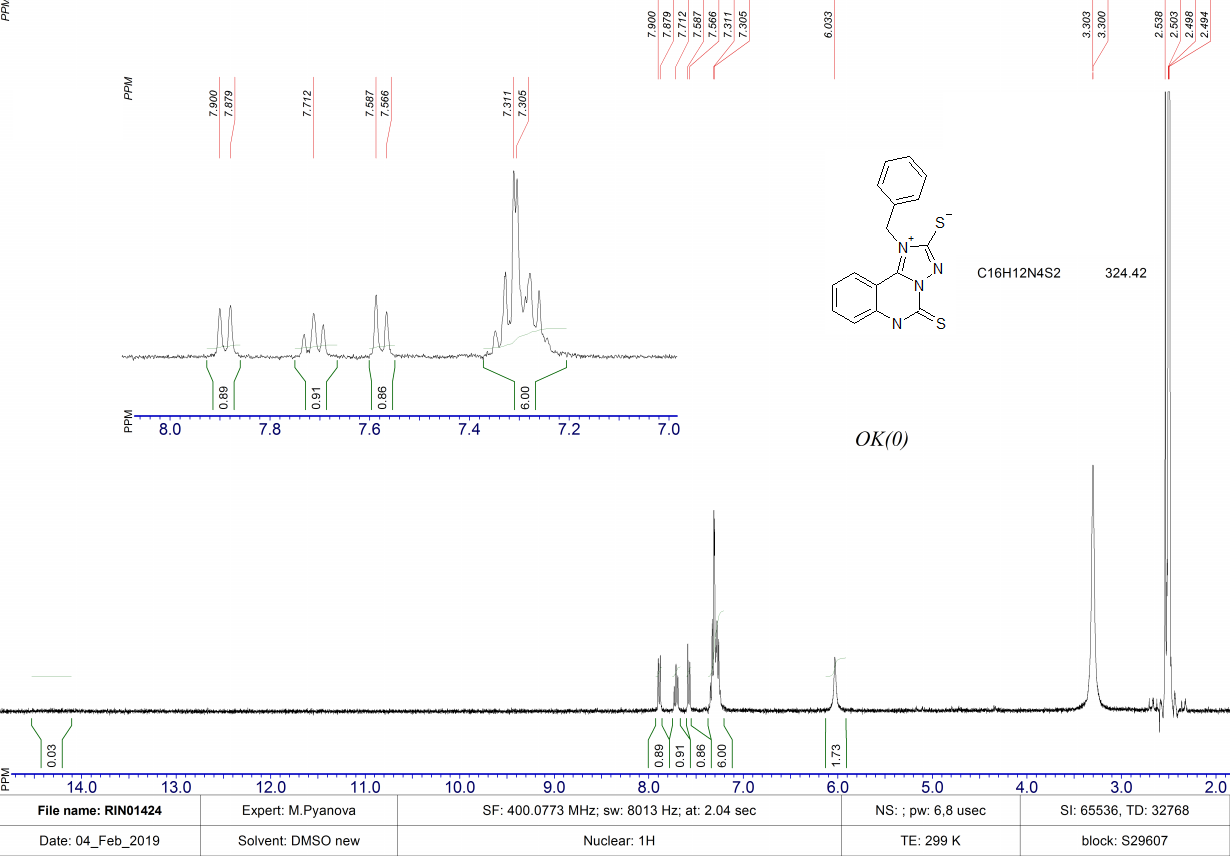


**Figure S16**. 1H NMR spectrum (400 MHz, DMSO-d6) of 1-benzyl-5-thioxo-5,6-dihydro-[1,2,4]triazolo[1,5-c]quina­zolin-1-ium-2-thiolate **6a.**


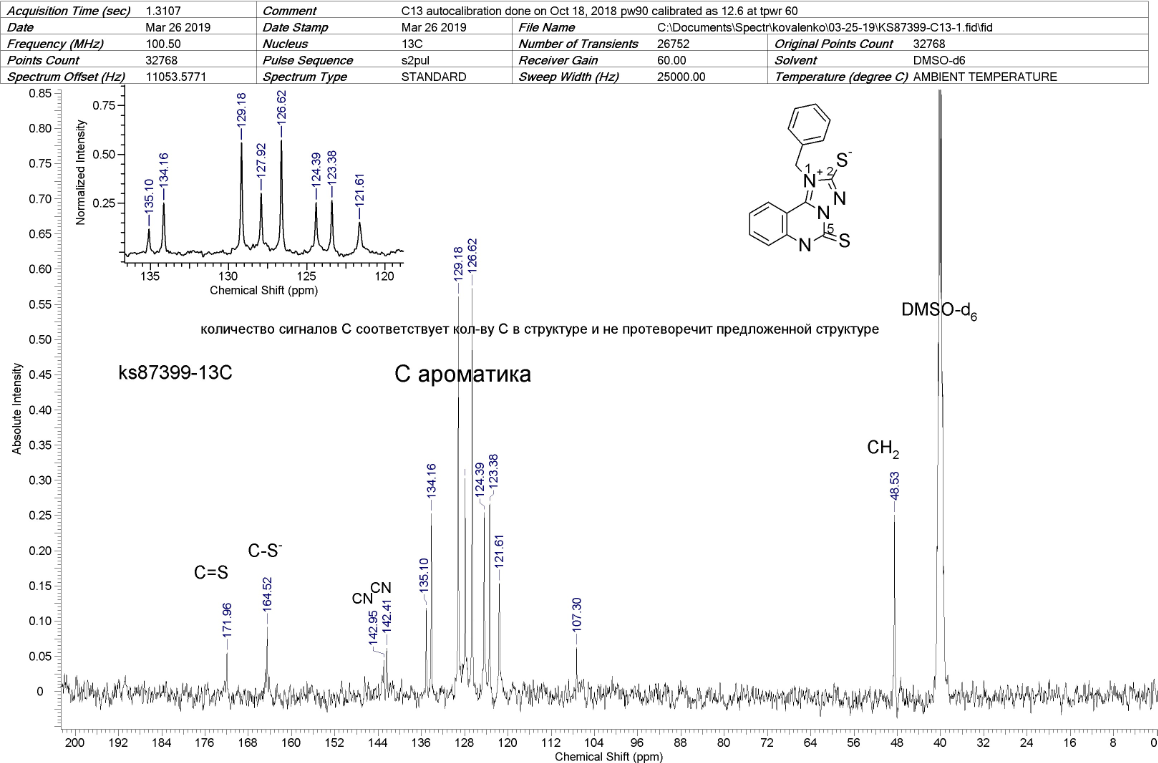


**Figure S17**. 13C NMR spectrum (100 MHz, DMSO-d6) of 1-benzyl-5-thioxo-5,6-dihydro-[1,2,4]triazolo[1,5-c]quina­zolin-1-ium-2-thiolate **6a.**


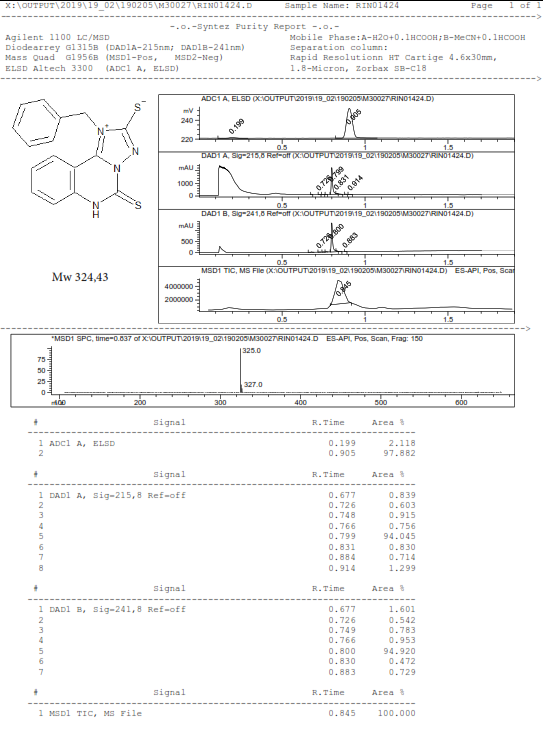


**Figure S18**. LC/MS data for 1-benzyl-5-thioxo-5,6-dihydro-[1,2,4]triazolo[1,5-c]quina­zolin-1-ium-2-thiolate **6a.**

**Figure S19**. IR spectrum of 1-benzyl-5-thioxo-5,6-dihydro-[1,2,4]triazolo[1,5-c]quina­zolin-1-ium-2-thiolate **6a.**

**Figure S20**.UV/Vis spectrum of 1-benzyl-5-thioxo-5,6-dihydro-[1,2,4]triazolo[1,5-c]quina­zolin-1-ium-2-thiolate **6a** (MeOH).

**1-Ethyl-5-thioxo-5,6-dihydro-[1,2,4]triazolo[1,5-c]­quina­zolin-1-ium-2-thiolate 6b**.


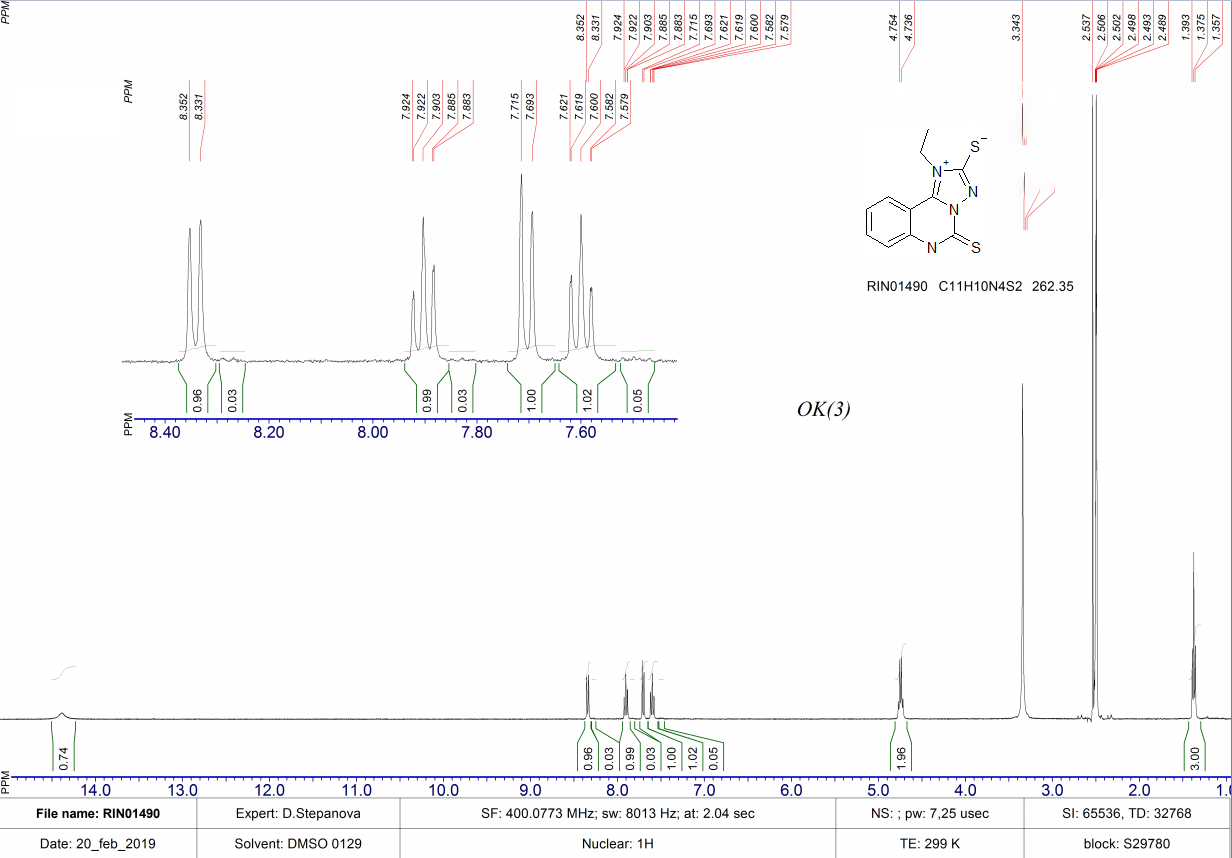


**Figure S21**. 1H NMR spectrum (400 MHz, DMSO-d6) of 1-ethyl-5-thioxo-5,6-dihydro-[1,2,4]triazolo[1,5-c]­quina­zolin-1-ium-2-thiolate **6b.**


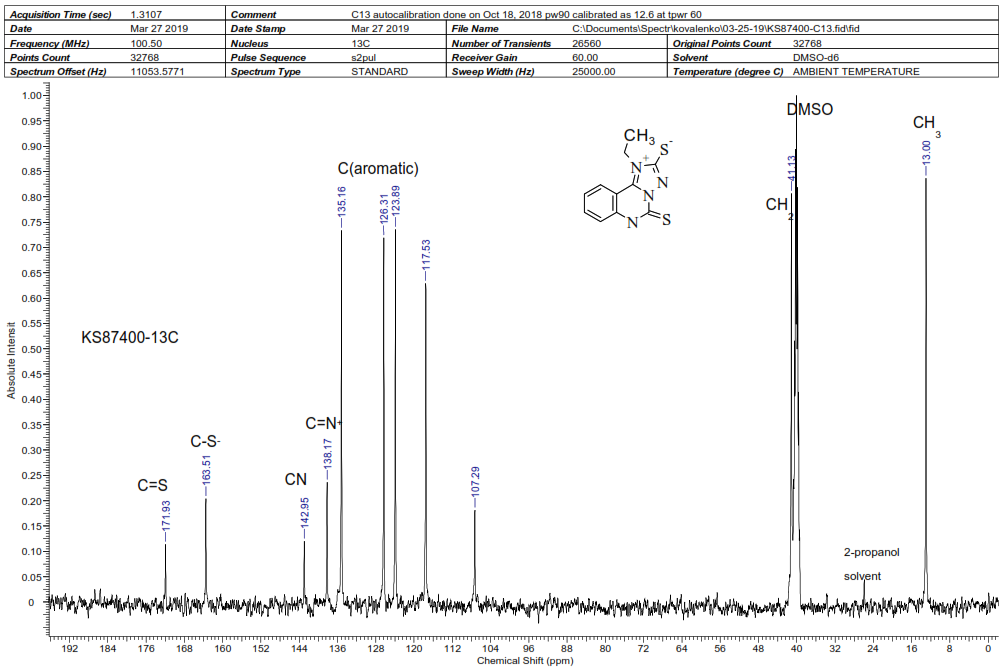


**Figure S22**. 13C NMR spectrum (100 MHz, DMSO-d6) of 1-ethyl-5-thioxo-5,6-dihydro-[1,2,4]triazolo[1,5-c]­quina­zolin-1-ium-2-thiolate **6b.**


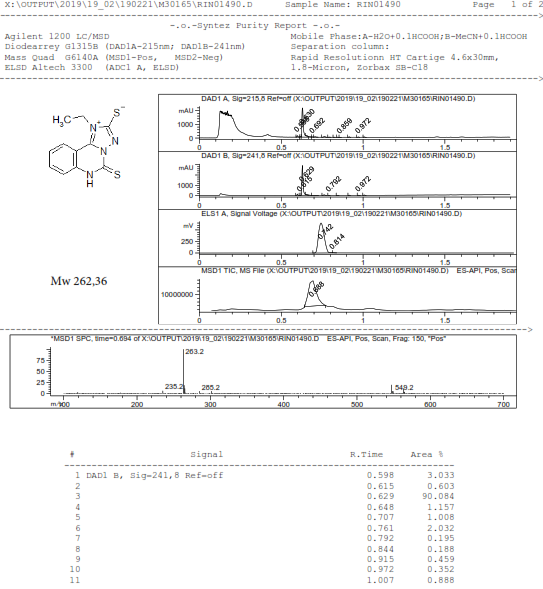


**Figure S23**. LC/MS data for 1-ethyl-5-thioxo-5,6-dihydro-[1,2,4]triazolo[1,5-c]­quina­zolin-1-ium-2-thiolate **6b.**

**Figure S24**. IR spectrum of 1-ethyl-5-thioxo-5,6-dihydro-[1,2,4]triazolo[1,5-c]­quina­zolin-1-ium-2-thiolate **6b.**

**Figure S25**.UV/Vis spectrum of 1-ethyl-5-thioxo-5,6-dihydro-[1,2,4]triazolo[1,5-c]­quina­zolin-1-ium-2-thiolate **6b** (MeOH).

**1-Phenyl-5-thioxo-5,6-dihydro-[1,2,4]tri­azo­lo[1,5-c]quina­zolin-1-ium-2-thiolate 6c**.


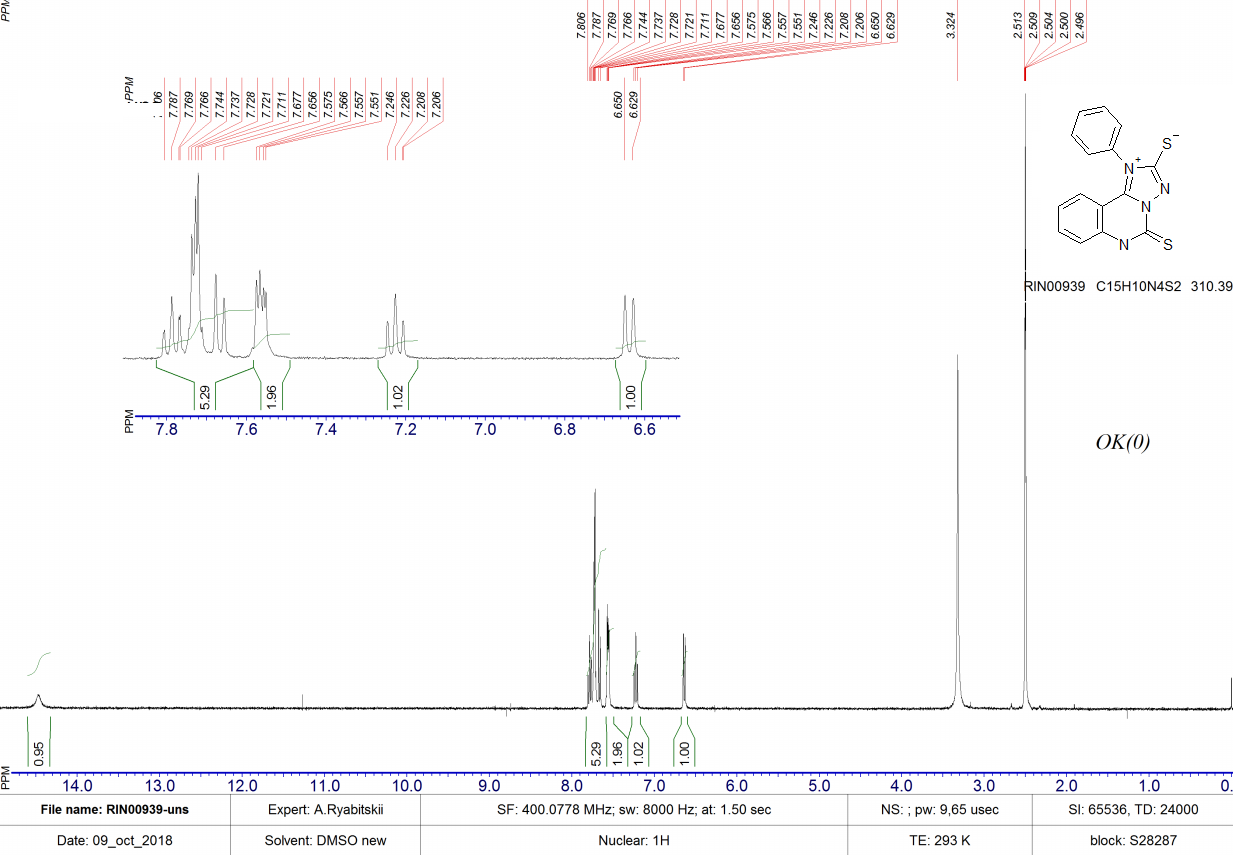


**Figure S26**. 1H NMR spectrum (400 MHz, DMSO-d6) of 1-phenyl-5-thioxo-5,6-dihydro-[1,2,4]tri­azo­lo[1,5-c]quina­zolin-1-ium-2-thiolate **6c.**


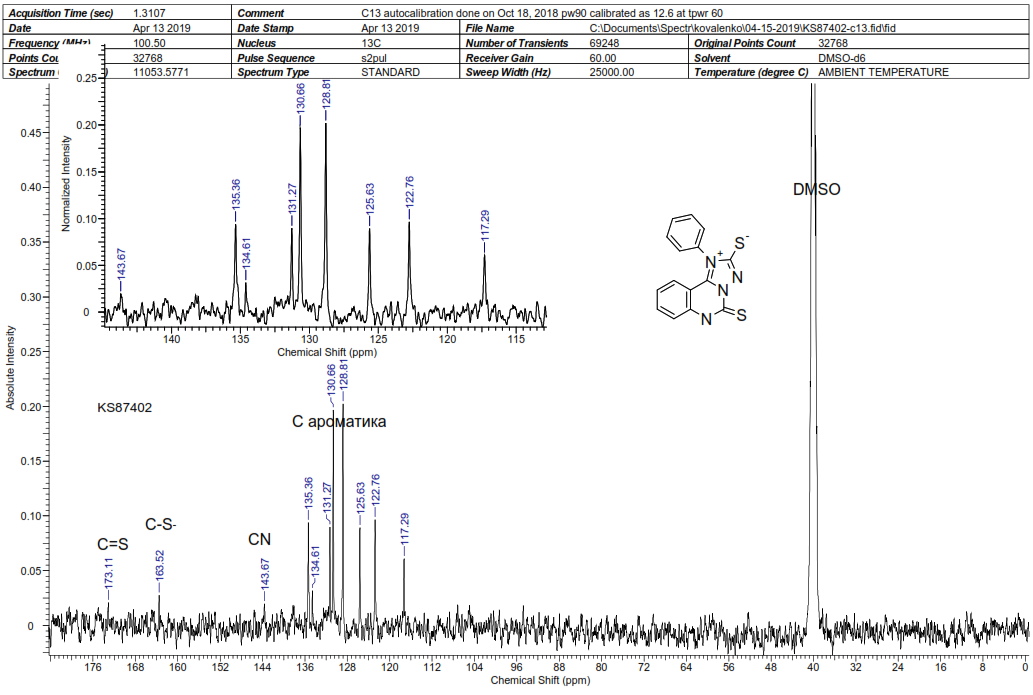


**Figure S27**. 13C NMR spectrum (100 MHz, DMSO-d6) of 1-phenyl-5-thioxo-5,6-dihydro-[1,2,4]tri­azo­lo[1,5-c]quina­zolin-1-ium-2-thiolate **6c.**


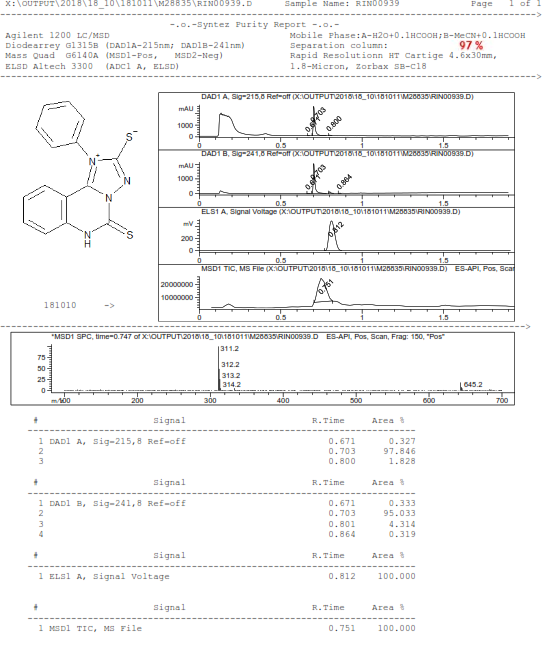


**Figure S28**. LC/MS data for 1-phenyl-5-thioxo-5,6-dihydro-[1,2,4]tri­azo­lo[1,5-c]quina­zolin-1-ium-2-thiolate **6c.**

**Figure S29**. IR spectrum of 1-phenyl-5-thioxo-5,6-dihydro-[1,2,4]tri­azo­lo[1,5-c]quina­zolin-1-ium-2-thiolate **6c.**

**Figure S30**.UV/Vis spectrum of 1-phenyl-5-thioxo-5,6-dihydro-[1,2,4]tri­azo­lo[1,5-c]quina­zolin-1-ium-2-thiolate **6c** (MeOH).
